# Supplementary material for: Ultrathin and efficient flexible polymer photovoltaic cells based on stable indium-free multilayer transparent electrodes
Source: Royal Society of Chemistry journal article supplement (doi:10.1039/c2jm33594h), 2012-01-01
Supplement: c2jm33594h.pdf [file c2jm33594h.pdf]

## Supporting Information

### Optical simulation

The optical transfer matrix of SWAW is: <sup>1</sup>

$$\begin{bmatrix} B \\ C \end{bmatrix} = \left\{ \prod_{j=1}^4 \begin{bmatrix} \cos \delta_j & \frac{i}{\eta_j} \sin \delta_j \\ i\eta_j \sin \delta_j & \cos \delta_j \end{bmatrix} \right\} \begin{bmatrix} 1 \\ \eta_5 \end{bmatrix}, \quad (\text{S1})$$

$$\eta_j = \begin{cases} N_j / \cos \theta_j & \text{For p-polarized wave} \\ N_j \cos \theta_j & \text{For s-polarized wave} \\ N_j & \text{For normal light incidence} \end{cases} \quad (\text{S2})$$

where  $j = 0$  (for incidence medium); 1, 2, 3 or 4 for SWAW layers; and 5 for the substrate layer. The angular phase thickness is  $\delta_j = \frac{2\pi}{\lambda} N_j d_j \cos \theta_j$ .  $\theta_j$  is the angle of wave propagation in the layer as determined from Snell's law.  $N_j$  denotes the refractive index of each layer, at the incident wavelength  $\lambda$ . The physical thicknesses of the plate of  $\text{WO}_3$  exposed to air, the Ag plate, the  $\text{WO}_3$  plate and the  $\text{SiO}_2$  plate on the glass substrate are represented by  $d_1$ ,  $d_2$ ,  $d_3$ , and  $d_4$ , respectively. The transmittance can be given as

$$T = \frac{4\eta_0\eta_5}{(\eta_0 B + C)^2}. \quad (\text{S3})$$

Here, we only consider vertical incidence, thus,  $\delta_j = \frac{2\pi}{\lambda} N_j d_j$ , and  $\eta_j = N_j$ . Using data of Ag from the literature,<sup>2</sup> we can simulate the transmittance for SWAW with glass  $N_5=1.52$  or PI  $N_5=1.75$  as a substrate and under vertical incidence, by inputting  $j=1, 2, 3, 4$ ,  $N_1=2.1$ ,  $N_2=n_2(\lambda)-ik_2(\lambda)$ ,  $N_3=2.1$ ,  $N_4=1.46$ ,  $N_5=1.52$  (or  $N_5=1.75$ ) using a computer.

### References

- 1 A. Thelen, *Design of Optical Interference Filters*, 1989, McGraw-Hill, New York, p. 9.
- 2 D. R. Lide, *CRC handbook of chemistry and physics*, 2008, CRC, Boca Raton, p. 417.

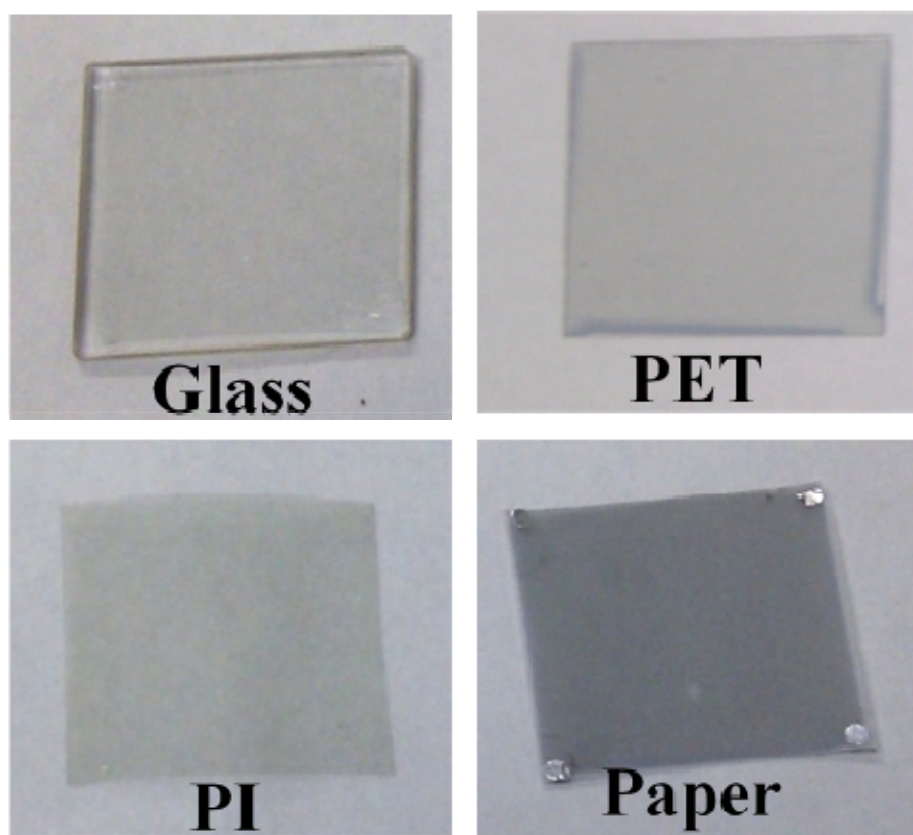

**Figure S1.** Photos of SAW electrodes deposited on different substrates.

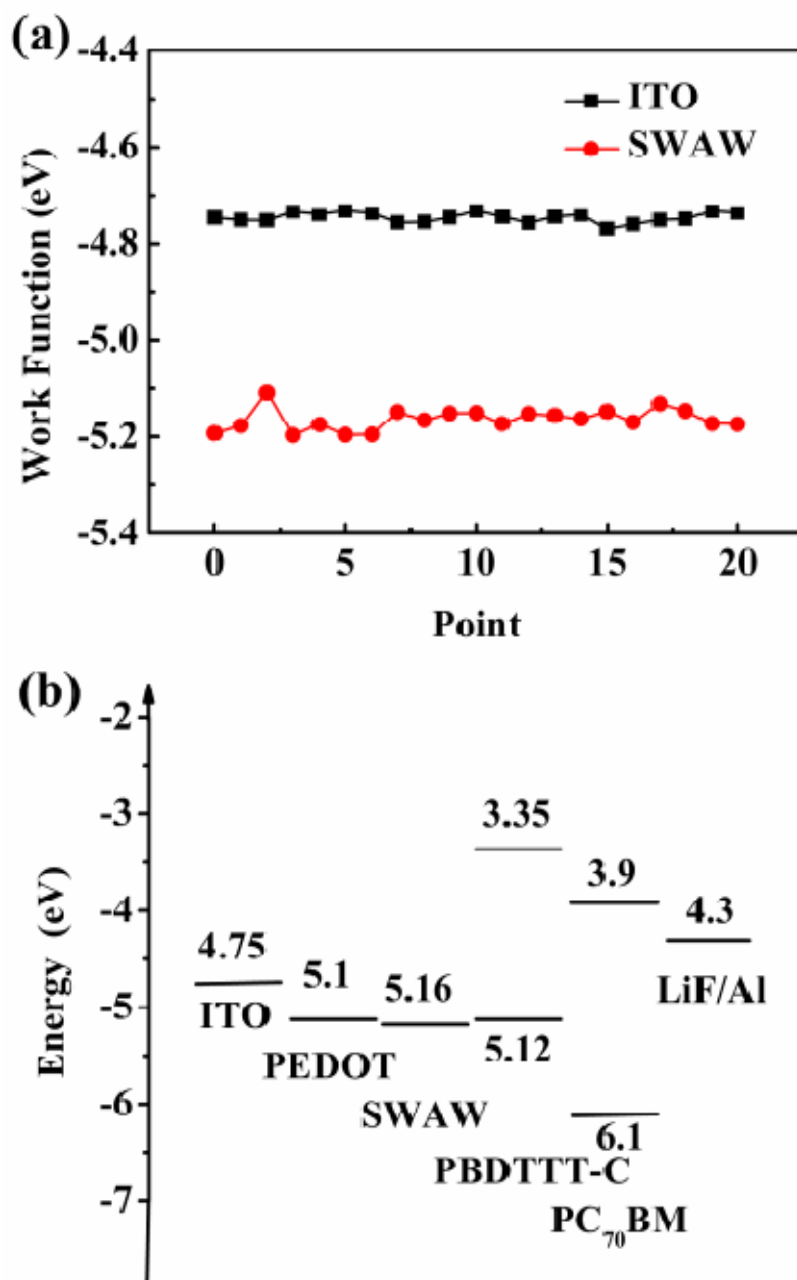

**Figure S2.** a) Work functions of ITO and SWAW. b) Energy level alignment of the polymer PV cells used in this study.

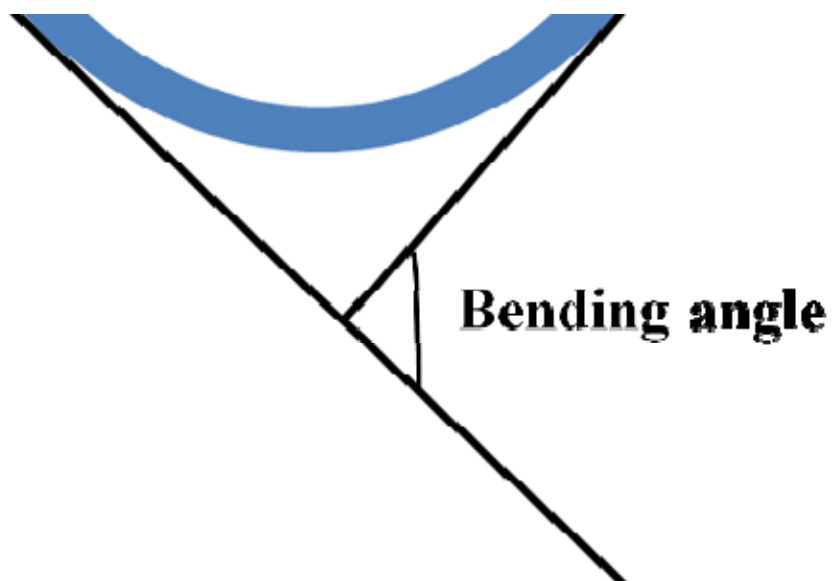

**Figure S3.** Diagram of the bending angle as defined in this paper.

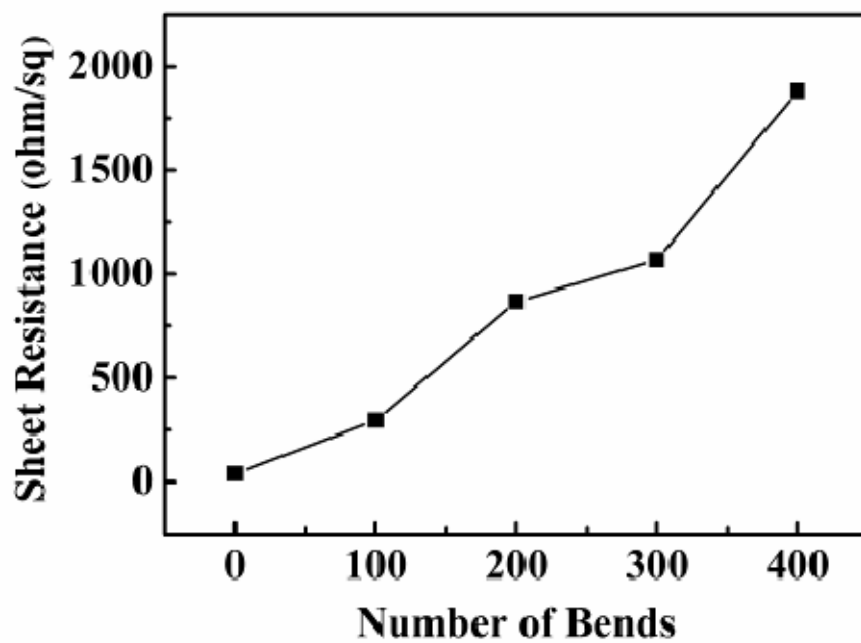

**Figure S4.** Sheet resistance of the PET/ITO flexible electrode as a function of the number of bends.

**Table S1.** Carrier concentrations, Hall mobilities and resistivities of the ITO and SWAW electrodes based on glass and PI substrates.

| <b>Samples</b> | <b>Carrier Density<br/>[cm<sup>-3</sup>]</b> | <b>Hall Mobility<br/>[cm<sup>2</sup> V<sup>-1</sup> s<sup>-1</sup>]</b> | <b>Resistivity<br/>[Ω·cm]</b> |
|----------------|----------------------------------------------|-------------------------------------------------------------------------|-------------------------------|
| Glass/ITO      | $-1.87 \times 10^{21}$                       | 49.1                                                                    | $6.80 \times 10^{-5}$         |
| Glass/SWAW     | $-6.531 \times 10^{21}$                      | 13.2                                                                    | $7.25 \times 10^{-5}$         |
| PI/SWAW        | $-6.595 \times 10^{21}$                      | 13.0                                                                    | $7.29 \times 10^{-5}$         |
| PET/SWAW       | $-5.832 \times 10^{21}$                      | 6.75                                                                    | $1.59 \times 10^{-4}$         |
| Paper/SWAW     | $-5.186 \times 10^{21}$                      | 0.92                                                                    | $1.31 \times 10^{-3}$         |
